# Supplementary material for: High-Frequency, Functional HIV-Specific T-Follicular Helper and Regulatory Cells Are Present Within Germinal Centers in Children but Not Adults
Source: PubMed Central journal article supplement (PMC6143653; doi:10.3389/fimmu.2018.01975), 2018-09-12
Supplement: Table_1.pdf [file Table_1.pdf]

# Table S1

| group                | ART | compartment | n  | age median (IQR) | CD4/mm <sup>3</sup> median (IQR) | VL cp/ml median (IQR)   |
|----------------------|-----|-------------|----|------------------|----------------------------------|-------------------------|
| Pediatric infected   | no  | PBMC        | 38 | 8.1 (6.6-9.8)    | 762 (297-1039)                   | 55,000 (14,000-178,848) |
| Pediatric infected   | yes | TMC         | 4  | 11.1 (9.4-12.1)  | 946 (532-1090)                   | 54 (<50 - 5102)         |
| Pediatric uninfected | N/A | PBMC        | 7  | 13.8 (12.0-15.0) | N/A                              | N/A                     |
| Pediatric uninfected | N/A | TMC         | 6  | 10.0 (7.8-11.5)  | N/A                              | N/A                     |
| Adult infected       | no  | PBMC        | 18 | 29.5 (26.8-33.3) | 356 (174-455)                    | 56,000 (35,250-140,000) |
| Adult infected       | no  | TMC         | 3  | 27.0 (26.0-34.0) | 493 (491-841)                    | 2452 (1372-42,148)      |
| Adult infected       | yes | TMC         | 3  | 27.0 (26.0-31.0) | 548 (379-591)                    | <50; N/D                |
| Adult uninfected     | N/A | PBMC        | 8  | 18.0 (17.0-19.8) | N/A                              | N/A                     |
| Adult uninfected     | N/A | TMC         | 3  | 30.0 (28.3-34.8) | N/A                              | N/A                     |

TMC: tonsil mononuclear cells

PBMC: peripheral blood mononuclear cells

N/A: not applicable

N/D: not done
