# Supplementary material for: High-Frequency, Functional HIV-Specific T-Follicular Helper and Regulatory Cells Are Present Within Germinal Centers in Children but Not Adults
Source: PubMed Central journal article supplement (PMC6143653; doi:10.3389/fimmu.2018.01975), 2018-09-12
Supplement: Table_2.pdf [file Table_2.pdf]

Table S2

| antigen       | fluorochrome    | clone       | supplier         | panel     |
|---------------|-----------------|-------------|------------------|-----------|
| CD69          | BUV 395         | FN50        | BD               | all TfH   |
| CCR6          | BUV 496         | 11A9        | BD               | all TfH   |
| PD1           | BV 421          | EH12.1      | BD               | all TfH   |
| CD8           | V500            | RPA-T8      | BD               | all TfH   |
| CCR4          | BV 605          | L291H4      | biolegend        | all TfH   |
| CD45RA        | BV 650          | HI100       | BD               | pheno TfH |
| CD25          | BV 711          | BC96        | biolegend        | pheno TfH |
| CD3           | BV 785          | OKT3        | biolegend        | all TfH   |
| CXCR5         | AlexaFluor 488  | RF8B2       | BD               | all TfH   |
| CCR7          | PerCp-Cy5-5     | G043H7      | biolegend        | pheno TfH |
| CD127         | PE-Cy5          | R34.34      | Beckmann Coulter | all TfH   |
| CD27          | PE-Cy7          | M-T271      | biolegend        | pheno TfH |
| CXCR3         | PE-CF594        | 1C6/CXCR3   | BD               | all TfH   |
| CD40L         | PE              | 24-31       | biolegend        | pheno TfH |
| ICOS          | Alexa Fluor 647 | C398.4A     | biolegend        | all TfH   |
| CD4           | AlexaFluor 700  | RPA-T4      | BD               | all TfH   |
| IL-2          | BV 650          | 5344.111    | biolegend        | ICS TfH   |
| INF- $\gamma$ | BV 711          | 4S.B3       | biolegend        | ICS TfH   |
| IL-17         | PerCp-Cy5-5     | eBio64DEC17 | ebioscience      | ICS TfH   |
| IL-21         | PE              | eBio3A3-N2  | ebioscience      | ICS TfH   |
| IL-4          | PE-Cy7          | MP4-25D2    | biolegend        | ICS TfH   |
